# Supplementary material
Source: PubMed Central journal article supplement (PMC8009602)
Supplement: NIHMS1675685-supplement-Supp_material.pdf [file NIHMS1675685-supplement-Supp_material.pdf]

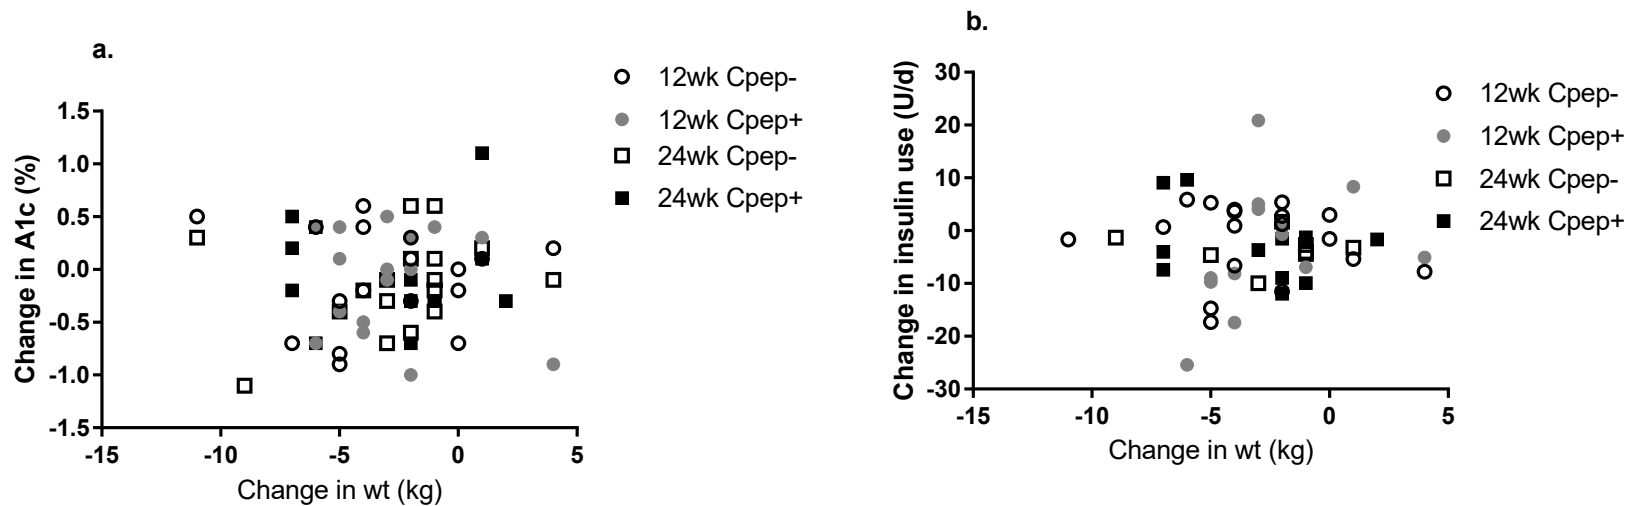

**Supplemental Figure 1: Change in metabolic parameters.** The relationship between the changes in HbA1c (%) (a) and in weight (b) are shown. There was not a significant relationship at either 12 or 24 mos.

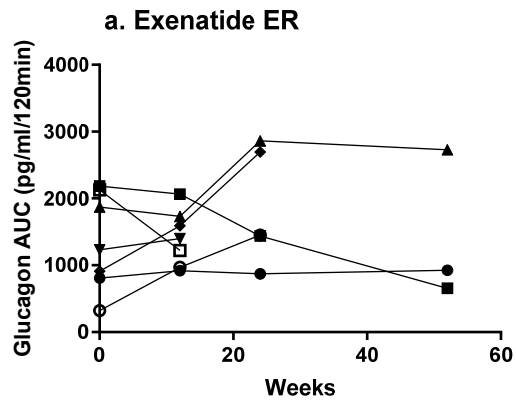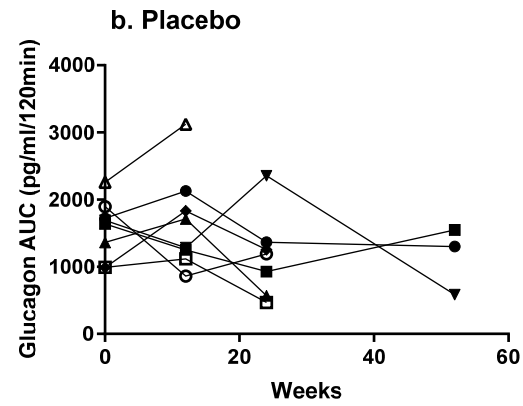

**Supplemental Figure 2:** Effects of treatment on glucagon during MMTTs. The AUC during each MMTT is shown. Each symbol represents a participant.

**Supplemental Table 1A and B:**

| <b>Table 1A: Baseline Characteristics*</b>                                                       |                            |               |                       |               |
|--------------------------------------------------------------------------------------------------|----------------------------|---------------|-----------------------|---------------|
| Characteristic                                                                                   | <b>Exenatide-ER (n=40)</b> |               | <b>Placebo (n=39)</b> |               |
| Gender (n male)(%)                                                                               | 11 (28%)                   |               | 14 (36%)              |               |
| Race (n white)(%)                                                                                | 34 (85%)                   |               | 35 (90%)              |               |
| Age yrs                                                                                          | 38.6 (12.06)               |               | 33.5 (11.4)           |               |
| BMI (kg/m <sup>2</sup> )                                                                         | 29.31 (6.35)               |               | 29.4 (6.34)           |               |
| HbA1c (%)                                                                                        | 7.40 (0.81)                |               | 7.81 (0.78)           |               |
| Duration of T1D (yrs) <sup>^</sup>                                                               | 22.1 (12.03)               |               | 17.1 (9.76)           |               |
| Daily insulin use (U/kg/d)                                                                       | 0.56 (0.17)#               |               | 0.62 (0.18)#          |               |
| C-peptide <sup>+</sup> (n)(%)                                                                    | 16 (40)                    |               | 17 (43.6)             |               |
| <b>Table 1B: Baseline characteristics based on C-peptide detection during the baseline MMTT*</b> |                            |               |                       |               |
|                                                                                                  | <b>Exenatide-ER</b>        |               | <b>Placebo</b>        |               |
| C-peptide:                                                                                       | Positive (n=16)            | Negative (24) | Positive (17)         | Negative (22) |
| Age                                                                                              | 38.6 (14.2)                | 38.5 (10.7)   | 35.5 (25.5)           | 31.9 (10.7)   |
| Sex (n male)                                                                                     | 2                          | 9             | 6                     | 8             |
| Duration of T1D (yrs)                                                                            | 17.4 (14.1)                | 25 (9.79)     | 12.7 (6.82)           | 20.3 (10.5)   |
| HbA1c                                                                                            | 7.3 (0.8)                  | 7.55 (0.78)   | 7.91 (0.72)           | 7.74 (0.84)   |
| BMI*                                                                                             | 29.0 (6.12)                | 30.52 (7.0)   | 29.0 (6.57)           | 29.75 (6.3)   |
| C-peptide AUC**                                                                                  | 0.278 (0.315)              | 0             | 0.214 (0.279)         | 0             |
| C-peptide peak (pmol/ml)                                                                         | 0.177 (0.22)               | 0             | 0.124 (0.178)         | 0             |
| Glucose AUC                                                                                      | 270.2 (41.9)               | 279.7 (46.6)  | 288.1 (14.5)          | 270.2 (41.9)  |

\* Mean, SD

<sup>^</sup> the duration of T1D was longer in the exenatide ER group vs placebo, p=0.046

\*\* ln(AUC pmol/ml /120+1)

<sup>^^</sup>Duration of diabetes in C-pep neg vs pos p = 0.0018 (Student's t-test)

# In the Exenatide-ER group, 9 (22.5%) were using multiple daily injections and 31 (77.5%) were using insulin pumps. In the Placebo group, 11 (28%) were using multiple daily injections and 27 were using insulin pumps (p=ns).

Supplemental Table 2a. Adverse Events On Study Drug

| Organ Class                                                    | Bydureon (n=39) |              |               |               |                   |               |                   | Placebo (n=35) |              |               |               |                   |               |                   |
|----------------------------------------------------------------|-----------------|--------------|---------------|---------------|-------------------|---------------|-------------------|----------------|--------------|---------------|---------------|-------------------|---------------|-------------------|
|                                                                | Event           | n(%)<br>Subj | Event<br>Rate | Gr 3<br>Event | n(%)<br>Gr 3 Subj | Gr 4<br>Event | n(%)<br>Gr 4 Subj | Event          | n(%)<br>Subj | Event<br>Rate | Gr 3<br>Event | n(%)<br>Gr 3 Subj | Gr 4<br>Event | n(%)<br>Gr 4 Subj |
| ALL BODY SYSTEM                                                | 448             | 38           | 2.67          | 40            | 11                | 12            | 3 (7.7%)          | 375            | 28           | 2.72          | 28            | 9 (25.7%)         | 0             | 0 (0.0%)          |
| BLOOD AND LYMPHATIC SYSTEM DISORDERS                           | 3               | 2            | 0.02          | 0             | 0 (0.0%)          | 0             | 0 (0.0%)          | 0              | 0            | 0.00          | 0             | 0 (0.0%)          | 0             | 0 (0.0%)          |
| CARDIAC DISORDERS                                              | 1               | 1            | 0.01          | 0             | 0 (0.0%)          | 0             | 0 (0.0%)          | 0              | 0            | 0.00          | 0             | 0 (0.0%)          | 0             | 0 (0.0%)          |
| EYE DISORDERS                                                  | 2               | 2            | 0.01          | 0             | 0 (0.0%)          | 0             | 0 (0.0%)          | 3              | 2            | 0.02          | 0             | 0 (0.0%)          | 0             | 0 (0.0%)          |
| GASTROINT ESTINAL DISORDERS                                    | 48              | 22           | 0.29          | 1             | 1 (2.6%)          | 0             | 0 (0.0%)          | 39             | 8            | 0.28          | 0             | 0 (0.0%)          | 0             | 0 (0.0%)          |
| GENERAL DISORDERS AND ADMINISTRATION SITE CONDITIONS           | 39              | 15           | 0.23          | 0             | 0 (0.0%)          | 0             | 0 (0.0%)          | 23             | 10           | 0.17          | 0             | 0 (0.0%)          | 0             | 0 (0.0%)          |
| INFECTIONS AND INFESTATIONS                                    | 11              | 10           | 0.07          | 1             | 1 (2.6%)          | 0             | 0 (0.0%)          | 16             | 10           | 0.12          | 1             | 1 (2.9%)          | 0             | 0 (0.0%)          |
| INJURY, POISONING AND PROCEDURAL COMPLICATIONS                 | 1               | 1            | 0.01          | 0             | 0 (0.0%)          | 0             | 0 (0.0%)          | 1              | 1            | 0.01          | 0             | 0 (0.0%)          | 0             | 0 (0.0%)          |
| INVESTIGATIONS                                                 | 4               | 2            | 0.02          | 0             | 0 (0.0%)          | 0             | 0 (0.0%)          | 0              | 0            | 0.00          | 0             | 0 (0.0%)          | 0             | 0 (0.0%)          |
| METABOLISM & NUTRITION DISORDERS                               | 289             | 25           | 1.72          | 37            | 8 (20.5%)         | 10            | 3 (7.7%)          | 249            | 23           | 1.80          | 27            | 9 (25.7%)         | 0             | 0 (0.0%)          |
| MUSCULOSKELETAL AND CONNECTIVE TISSUE DISORDERS                | 11              | 7            | 0.07          | 0             | 0 (0.0%)          | 0             | 0 (0.0%)          | 4              | 4            | 0.03          | 0             | 0 (0.0%)          | 0             | 0 (0.0%)          |
| NEOPLASMS BENIGN, MALIGNANT AND UNSPECIFIED (INCL CYSTS AND PO | 1               | 1            | 0.01          | 0             | 0 (0.0%)          | 0             | 0 (0.0%)          | 0              | 0            | 0.00          | 0             | 0 (0.0%)          | 0             | 0 (0.0%)          |
| NERVOUS SYSTEM DISORDERS                                       | 8               | 6            | 0.05          | 1             | 1 (2.6%)          | 0             | 0 (0.0%)          | 10             | 5            | 0.07          | 0             | 0 (0.0%)          | 0             | 0 (0.0%)          |
| PSYCHIATRIC DISORDERS                                          | 3               | 2            | 0.02          | 0             | 0 (0.0%)          | 2             | 1 (2.6%)          | 0              | 0            | 0.00          | 0             | 0 (0.0%)          | 0             | 0 (0.0%)          |
| RENAL AND URINARY DISORDERS                                    | 0               | 0            | 0.00          | 0             | 0 (0.0%)          | 0             | 0 (0.0%)          | 1              | 1            | 0.01          | 0             | 0 (0.0%)          | 0             | 0 (0.0%)          |
| RESPIRATORY, THORACIC AND MEDIASTINAL DISORDERS                | 3               | 3            | 0.02          | 0             | 0 (0.0%)          | 0             | 0 (0.0%)          | 9              | 6            | 0.07          | 0             | 0 (0.0%)          | 0             | 0 (0.0%)          |
| SKIN AND SUBCUTANEOUS TISSUE DISORDERS                         | 18              | 15           | 0.11          | 0             | 0 (0.0%)          | 0             | 0 (0.0%)          | 15             | 9            | 0.11          | 0             | 0 (0.0%)          | 0             | 0 (0.0%)          |
| VASCULAR DISORDERS                                             | 0               | 0            | 0.00          | 0             | 0 (0.0%)          | 0             | 0 (0.0%)          | 1              | 1            | 0.01          | 0             | 0 (0.0%)          | 0             | 0 (0.0%)          |

Supplemental Table 2b Adverse Events Off Study Drug

| Organ Class                                                 | Bydureon (n=37) |      |            |       |            |       |           | Placebo (n=26) |       |            |           |           |           |           |
|-------------------------------------------------------------|-----------------|------|------------|-------|------------|-------|-----------|----------------|-------|------------|-----------|-----------|-----------|-----------|
|                                                             | Event           | n(%) | Event Rate | Gr 3  | n(%)       | Gr 4  | n(%)      | Event          | n(%)  | Event Rate | Gr 3      | n(%)      | Gr 4      | n(%)      |
|                                                             |                 | Subj |            | Event | Gr 3 Subj  | Event | Gr 4 Subj |                | Event |            | Gr 3 Subj | Event     | Gr 4 Subj |           |
| ALL BODY SYSTEM                                             | 201             | 29   | 0.87       | 23    | 12 (32.4%) | 4     | 3 (8.1%)  | 287            | 25    | 1.72       | 25        | 8 (30.8%) | 5         | 3 (11.5%) |
| EYE DISORDERS                                               | 4               | 3    | 0.02       | 1     | 1 (2.7%)   | 0     | 0 (0.0%)  | 3              | 2     | 0.02       | 0         | 0 (0.0%)  | 0         | 0 (0.0%)  |
| GASTROINTESTINAL DISORDERS                                  | 10              | 6    | 0.04       | 1     | 1 (2.7%)   | 0     | 0 (0.0%)  | 8              | 6     | 0.05       | 0         | 0 (0.0%)  | 0         | 0 (0.0%)  |
| GENERAL DISORDERS AND ADMINISTRATION SITE CONDITIONS        | 6               | 4    | 0.03       | 0     | 0 (0.0%)   | 0     | 0 (0.0%)  | 1              | 1     | 0.01       | 0         | 0 (0.0%)  | 0         | 0 (0.0%)  |
| INFECTIONS AND INFESTATIONS                                 | 10              | 6    | 0.04       | 0     | 0 (0.0%)   | 0     | 0 (0.0%)  | 6              | 6     | 0.04       | 1         | 1 (3.8%)  | 0         | 0 (0.0%)  |
| INJURY, POISONING AND PROCEDURAL COMPLICATIONS              | 2               | 2    | 0.01       | 0     | 0 (0.0%)   | 0     | 0 (0.0%)  | 1              | 1     | 0.01       | 0         | 0 (0.0%)  | 0         | 0 (0.0%)  |
| INVESTIGATIONS                                              | 1               | 1    | 0.00       | 0     | 0 (0.0%)   | 0     | 0 (0.0%)  | 3              | 2     | 0.02       | 0         | 0 (0.0%)  | 0         | 0 (0.0%)  |
| METABOLISM & NUTRITION DISORDERS                            | 148             | 23   | 0.64       | 19    | 10 (27.0%) | 4     | 3 (8.1%)  | 244            | 22    | 1.46       | 24        | 7 (26.9%) | 4         | 2 (7.7%)  |
| MUSCULOSKELETAL AND CONNECTIVE TISSUE DISORDERS             | 6               | 4    | 0.03       | 1     | 1 (2.7%)   | 0     | 0 (0.0%)  | 5              | 1     | 0.03       | 0         | 0 (0.0%)  | 0         | 0 (0.0%)  |
| NEOPLASMS BENIGN, MALIGNANT AND UNSPECIFIED (INCL CYSTS AND | 1               | 1    | 0.00       | 0     | 0 (0.0%)   | 0     | 0 (0.0%)  | 0              | 0     | 0.00       | 0         | 0 (0.0%)  | 0         | 0 (0.0%)  |
| NERVOUS SYSTEM DISORDERS                                    | 0               | 0    | 0.00       | 0     | 0 (0.0%)   | 0     | 0 (0.0%)  | 3              | 2     | 0.02       | 0         | 0 (0.0%)  | 0         | 0 (0.0%)  |
| RESPIRATORY, THORACIC AND MEDIASTINAL DISORDERS             | 2               | 2    | 0.01       | 0     | 0 (0.0%)   | 0     | 0 (0.0%)  | 7              | 5     | 0.04       | 0         | 0 (0.0%)  | 1         | 1 (3.8%)  |
| SKIN AND SUBCUTANEOUS TISSUE DISORDERS                      | 2               | 1    | 0.01       | 0     | 0 (0.0%)   | 0     | 0 (0.0%)  | 1              | 1     | 0.01       | 0         | 0 (0.0%)  | 0         | 0 (0.0%)  |
| SURGICAL AND MEDICAL PROCEDURES                             | 5               | 3    | 0.02       | 1     | 1 (2.7%)   | 0     | 0 (0.0%)  | 0              | 0     | 0.00       | 0         | 0 (0.0%)  | 0         | 0 (0.0%)  |

**Supplemental Table 3: Serious Adverse Events:**

| Term                        | Exenatide ER         |          | Placebo              |          |
|-----------------------------|----------------------|----------|----------------------|----------|
|                             | Affected/at Risk (%) | # events | Affected/at Risk (%) | # events |
| Anaphylaxis                 | 0/39 (0%)            | 0        | 1/35 (2.86%)         | 1        |
| Infections and infestations | 1/39 (2.56%)         | 1        | 0/35 (0%)            | 0        |
| Pelvic infection            | 0/39 (0%)            | 0        | 1/35 (2.86%)         | 1        |
| Urinary tract infection     | 0/39 (0%)            | 0        | 1/35 (2.86%)         | 1        |
| Acidosis (DKA)              | 1/39 (2.56%)         | 2        | 0/35 (0%)            | 0        |
| Hyperglycemia               | 1/39 (2.56%)         | 1        | 0/35 (0%)            | 0        |
| Hypoglycemia                | 3/39 (7.69%)         | 6        | 0/35 (0%)            | 0        |
